# Supplementary material for: A study combining magic-angle spinning NMR and small-angle X-ray scattering on the interaction in the mixture of poly(benzyl methacrylate) and ionic liquid 1-ethyl-3-methylimidazolium bis(trifluoromethanesulfonyl)amide
Source: Royal Society of Chemistry journal article supplement (doi:10.1039/d2cp02207a), 2022-01-01
Supplement: d2cp02207a1.pdf [file d2cp02207a1.pdf]

## ***Electronic Supplementary Information***

### **A study combining magic-angle spinning NMR and small-angle X-ray scattering on the interaction in the mixture of poly(benzyl methacrylate) and ionic liquid 1-ethyl-3-methylimidazolium bis(trifluoromethanesulfonyl)amide**

Takeshi Morita,<sup>1,\*</sup> Hitomi Okada,<sup>2</sup> Taisei Yamada,<sup>1</sup> Ryo Hidaka,<sup>2</sup> Takeshi Ueki,<sup>3,4</sup> Kazuyuki Niitsuma,<sup>5</sup> Yuzo Kitazawa,<sup>5</sup> Masayoshi Watanabe,<sup>5,6</sup> Keiko Nishikawa<sup>1,7</sup> and Kenjiro Higashi<sup>2,\*</sup>

- 1 Department of Chemistry, Graduate School of Science, Chiba University, 1-33 Yayoi, Inage-ku, Chiba 263-8522, Japan
- 2 Graduate School of Pharmaceutical Sciences, Chiba University, 1-8-1 Inohana, Chuo-ku, Chiba 260-8675, Japan
- 3 Research Center for Functional Materials, National Institute for Materials Science (NIMS), 1-1 Namiki, Tsukuba, Ibaraki 305-0044, Japan
- 4 Graduate School of Life Science, Hokkaido University, Kita 10, Nishi 8, Kita-ku, Sapporo 060-0810, Japan
- 5 Department of Chemistry and Biotechnology, Yokohama National University, 79-5 Tokiwadai, Hodogaya-ku, Yokohama 240-8501, Japan
- 6 Institute of Advanced Sciences, Yokohama National University, 79-5 Tokiwadai, Hodogaya-ku, Yokohama 240-8501, Japan
- 7 Toyota Physical & Chemical Research Institute, 41-1 Yokomichi, Nagakute, Aichi 480-1192, Japan

Corresponding authors

\*Email: T Morita (moritat@faculty.chiba-u.jp) or K Higashi (ken-h@faculty.chiba-u.jp)

#### **Overlap concentration**

On the basis of the Guinier approximation,<sup>1</sup> the radius of gyration,  $R_g$ , of the PBnMA chain was evaluated to be  $3.6 \pm 0.1$ ,  $4.5 \pm 0.2$  and  $5.8 \pm 0.5$  nm for the polymers with  $M_w = 18$ , 27 and 40 kDa, respectively. The Guinier plots of the SAXS profiles for the polymer with  $M_w = 18$ , 27 and 40 kDa are shown in Fig. S1. The  $R_g$  values were determined by iteration with checking the consistency between the evaluated  $R_g$  value and the appropriate  $q$ -region as determined on the basis of  $1/R_g$ . The overlap

concentrations,  $c^*$ , for the polymers with  $M_w = 18, 27$  and  $40$  kDa were approximately estimated to be  $0.16, 0.12$  and  $0.080$  g/mL (corresponding to *ca.* 16, 12 and 8.0 wt%), respectively, using the equation  $c^* = 3M_w/(4\pi N_A R_g^3)$ , where  $N_A$  is the Avogadro's number.<sup>2,3</sup> Considering the estimated concentrations, the concentration studied here was sufficiently low compared with  $c^*$ .

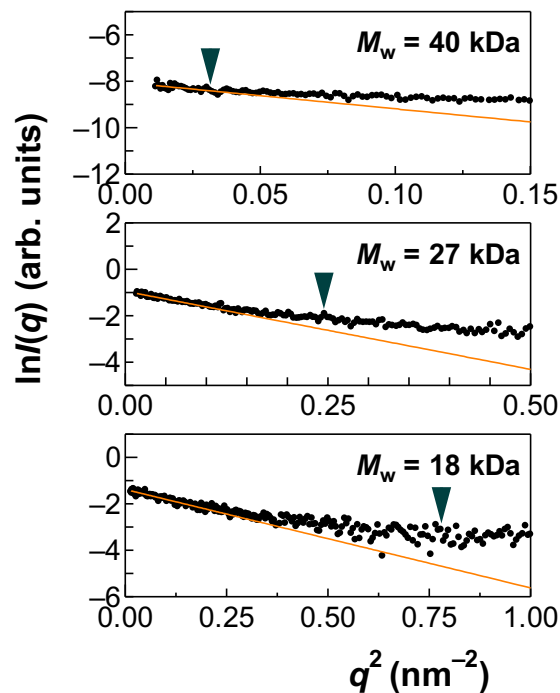

**Fig. S1:** The Guinier plots,  $\ln I(q)$  vs.  $q^2$ , of the SAXS profiles for PBNMA in  $[C_2mim][NTf_2]$ . Solid lines represent the determined slope for evaluation of radius of gyration,  $R_g$ , using the appropriate small-angle region below  $q = 1/R_g$ . Green arrows indicate the appropriate  $q$ -region as determined on the basis of  $1/R_g$ .

### Concentration dependence of radius of gyration

Fig. S2 shows concentration dependence of the evaluated  $R_g$  for the polymer of  $M_w = 18$  kDa. The  $R_g$  values at concentrations of 0.10, 0.25 and 1.0wt% were evaluated using the Guinier approximation.<sup>1</sup> Although the concentration of 1wt% is considered as sufficiently low compared with  $c^*$ , the  $R_g$  values showed concentration dependence and increased with decreasing the concentration. The tendency identified in Fig. S2 is normally observable in solution systems.<sup>4</sup>

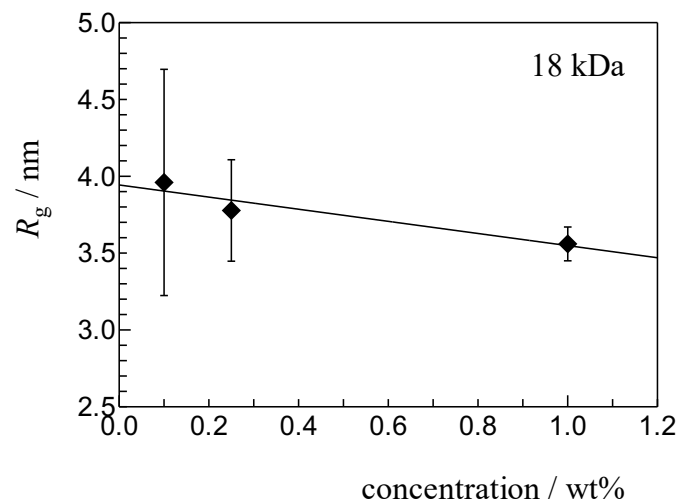

**Fig. S2:** Concentration dependence of  $R_g$  for PBnMA with  $M_w = 18$  kDa in  $[\text{C}_2\text{mim}][\text{NTf}_2]$ .

Fig. S3 shows dependence of the infinite dilution radius of gyration,  $R_g(c \rightarrow 0)$ , on the molecular weight. The molecular weights were set at  $M_w = 18, 27, 40$  and  $78$  kDa.

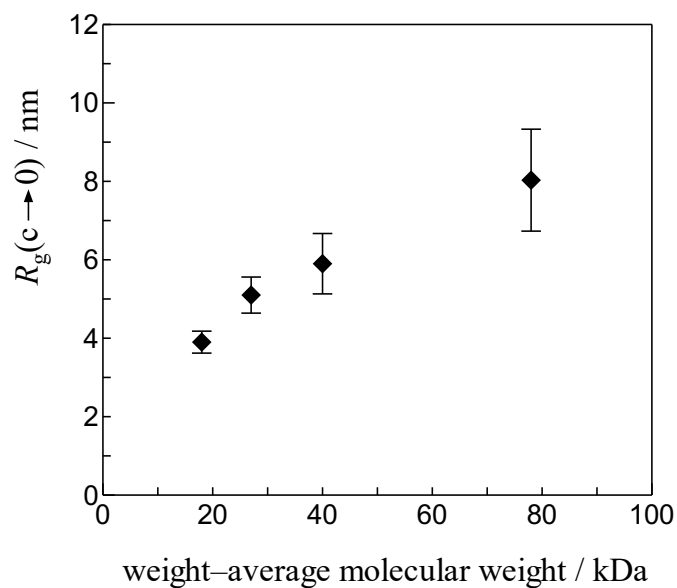

**Fig. S3:** Dependence of  $R_g(c \rightarrow 0)$  on molecular weight of PBnMA.

## References

1. A. Guinier and G. Fournet, *Small-angle Scattering of X-rays*, Wiley, New York, 1955.
2. J. P. Cotton, M. Nierlich, F. Boué, M. Daoud, B. Farnoux, G. Jannink, R. Duplessix and C. Picot, *J. Chem. Phys.*, 1976, **65**, 1101–1108.
3. Q. Ying and B. Chu, *Macromolecules*, 1987, **20**, 362–366.
4. O. Glatter and O. Kratky, *Small Angle X-Ray Scattering*; Academic Press: New York, 1982.
